# Supplementary material
Source: PubMed Central journal article supplement (PMC4267378)
Supplement: pnas.201409700SI.pdf [file pnas.201409700SI.pdf]

# Supporting Information

Hefetz-Sela et al. 10.1073/pnas.1409700111

## SI Methods

**Mice.** Mdr2<sup>-/-</sup>-c-Jun<sup>WT/WT</sup> served as control mice for Mdr2<sup>-/-</sup>-c-Jun<sup>AA/AA</sup>, and Mdr2<sup>-/-</sup>-c-Jun<sup>fl/fl</sup> served as a control for Mdr2<sup>-/-</sup>-c-Jun<sup>Δhep</sup>. For hepatocarcinogenesis, Mdr2<sup>-/-</sup>-c-Jun<sup>WT/WT</sup> and Mdr2<sup>-/-</sup>-c-Jun<sup>AA/AA</sup> were killed at 11–12 mo of age and Mdr2<sup>-/-</sup>-c-Jun<sup>fl/fl</sup> and Mdr2<sup>-/-</sup>-c-Jun<sup>Δhep</sup> at 14–15 mo of age. BrdU was injected (Amersham; 100 μL per 10 g of body weight) 3 h before death. Animals were killed by a lethal dose of anesthesia and perfused through the left ventricle with heparinized PBS followed by buffered formalin. See Table S2 for genotyping primers.

**Histology and Quantification of Tumors.** Immediately after death, livers were removed and fixed in 4% (wt/vol) buffered formalin. For macroscopic quantification, externally visible tumors were counted on the liver surface. Microscopic quantification of tumors and examination of liver H&E sections were performed by expert liver pathologists (O.P. and E.P.). Both macroscopic and histologic analyses were performed in a blinded fashion. Serum alanine transaminase (ALT), alkaline phosphatase (ALP), and aspartate aminotransferase (AST/GOT) levels were determined by using the Reflotron Plus analysis system (Roche).

**Immunohistochemistry.** Antibodies used were as follows: c-Jun (BD Transduction Laboratories; clone 3/Jun); phospho-c-Jun Ser-63 (Cell Signaling; no. 9261); phospho-c-Jun Ser-73 (D47G9) (Cell Signaling; no. 3270); F4/80 (Serotec; CI:A3-1); Foxp3 (eBioscience; no. 14-5773); BrdU (Thermo Scientific; MS-1058-R7); Cleaved caspase-3 (Cell Signaling; no. 9661); CCL17 (R&D; AF529); p53 (Novocastra CM5); and p21 (Santa Cruz; F-5). All stains were performed on 5-μm formalin-fixed paraffin-embedded sections. After antigen retrieval, endogenous peroxidase was blocked by 3% H<sub>2</sub>O<sub>2</sub>. Afterward, slides were incubated with primary antibody diluted in Cas-block (Zymed), washed, and incubated with the appropriate secondary HRP-conjugated antibody (Dako; mouse; Vector Labs; rabbit; Histofine; rat and goat). Slides were developed with the HRP substrate diaminobenzidine (Thermo Scientific) and counterstained with hematoxylin. Double immunostaining for Foxp3 and CCL17 was performed with the Polink DS-GRT-Hu/Ms Kit (GBI Laboratories).

For quantification of immunostains, stained slides were counted either manually by counting the number of positive cells per 10 high-power fields or quantified with the Ariol SL-50 automated scanning microscope and image-analysis system (Genetix). Briefly, the frequency of positive cells was assessed with the appropriate module of the Ariol SL-50. For each sample, the percentage of positive cells or the intensity of the staining was determined in 10 (arbitrarily chosen) fields.

**Chronic Inflammation Induced by Liposomal LPS.** Mice were injected s.c. with LPS (*Escherichia coli* strain 055:B5; L-4524; Sigma) encapsulated in multilamellar liposomal vesicles as described (1).

LPS was administered three times, every 5 d at a dose of 70 μg per animal for the induction of chronic inflammation (2). Spleen was weighed, and the percent of Foxp3<sup>+</sup>CD4<sup>+</sup> Treg cells out of splenocytes and out of PBLs was determined by FACS. For FACS analysis, cells were stained with phycoerythrin (PE)-conjugated anti-Foxp3 antibody and FITC-conjugated anti-CD4-FITC antibody (Miltenyi). Samples were analyzed in a FACSCalibur apparatus by using Cell Quest software (BD Pharmingen).

**Treg Cell Conversion Assay.** CD4<sup>+</sup>CD25<sup>-</sup> T cells were isolated from mouse spleens by negative selection (Miltenyi). Cells were >90% pure, as determined by FACS analysis. A total of 1.5 × 10<sup>6</sup> cells per mL of CD4<sup>+</sup>CD25<sup>-</sup> was stimulated with anti-CD3/CD28 (2 μg/mL) ± TGF-β (5 ng/mL) ± IL-2 (25 U/mL) in complete RPMI medium 1640 for 4 d in 24-well plates (3). Upon harvesting, cells were centrifuged and resuspended in PBS containing 1.5% FCS. Cells were stained with surface antibodies allophycocyanin (APC)-conjugated anti-CD25 and FITC-conjugated anti-CD4. Intracellular staining was performed with PE-conjugated anti-Foxp3 (Miltenyi).

**Liver Macrophage Isolation.** Kupffer cells were isolated from Mdr2<sup>-/-</sup> mice livers essentially as described by Kamimura and Tsukamoto (4). Livers were digested enzymatically with Pronase (Roche) and Collagenase (Sigma) by in situ perfusion. Non-parenchymal cells were isolated by centrifugation of the digest at 150 × g for 8 min and were laid on top of a four density Larcoll gradient. The gradients were centrifuged at 49,280 × g for 30 min at 25 °C by using a SW41Ti rotor (Beckman). A pure population of Kupffer cells was recovered from the interface between 8% and 12% Larcoll, washed, and immediately frozen in liquid nitrogen for further analysis. Purity of the Kupffer cell fraction was determined by H&E staining of cytopins preparations and always was >90%.

**Macrophage Polarization in Culture.** Peritoneal elicited macrophages (PECs) were obtained from mice injected 4 d previously with 1 mL of 3% (wt/vol) Thioglycollate (Difco). A total of 0.25 × 10<sup>6</sup> macrophages per mice was seeded in 4 mL of RPMI medium 1640 containing 10% FBS, 2 mM glutamine, and 100 U/mL penicillin-streptomycin in 60-mm culture dishes, and after 2 h of incubation, nonadherent cells were washed off (×2) with medium. Monolayers were >95% macrophages, as evidenced by morphology. PECs were then incubated for additional 2 h before starting M1- or M2-inducing protocols [described in Porta et al. (5)]: To induce M1 activation, cells were incubated in medium for 20 h, washed, left in medium for 2 h, and finally stimulated with LPS for 4 h. For inducing M2 polarization, two protocols were used: Cells were incubated in the presence of LPS for 20 h, washed, and maintained in RPMI medium for 2 h and then rechallenged with LPS for 4 h (M2a) or cells were treated with LPS for 20 h, washed, and then maintained in medium for an additional 6 h without LPS rechallenge (M2b). Control cells were cultured in medium for the entire period of the experiment. For gene-expression analysis, total RNA was extracted with TRIzol (Invitrogen). LPS concentration for inducing treatments was 100 ng/mL.

**In Vivo Migratory Assay of CFSE-Labeled Treg Cells.** Splenic CD4<sup>+</sup>CD25<sup>+</sup> Treg cells were purified by using MACS (Miltenyi) from 3-mo-old Mdr2<sup>-/-</sup>-c-Jun<sup>WT/WT</sup> mice and labeled with CFSE (Promega). A total of 5 × 10<sup>5</sup> CFSE-labeled cells were injected through the tail vein into 9-mo-old Mdr2<sup>-/-</sup>-c-Jun<sup>WT/WT</sup> or Mdr2<sup>-/-</sup>-c-Jun<sup>AA/AA</sup> mice. The livers were harvested 48 h after adoptive transfer and dissociated into single cell suspensions, and the percentage of CFSE-labeled cells was determined by FACS.

**qPCR.** Total RNA was extracted with TRIzol and was reverse-transcribed by the high-capacity cDNA reverse transcription kit (Applied Biosystems). qPCR reactions were run in triplicates in 384-well plates on the AB7900 Real Time PCR system. Platinum Syber mix was used in all experiments. Results were analyzed by

using the Dataassist software (Version 2.0; Applied Biosystems). Every experiment included two out of three reference genes:

PP1A, HPRT, or Actin. For details of the exon-skipping primers, see Table S1.

1. Joseph A, et al. (2002) Liposomal immunostimulatory DNA sequence (ISS-ODN): An efficient parenteral and mucosal adjuvant for influenza and hepatitis B vaccines. *Vaccine* 20(27-28):3342–3354.
2. Vaknin I, et al. (2008) A common pathway mediated through Toll-like receptors leads to T- and natural killer-cell immunosuppression. *Blood* 111(3):1437–1447.
3. Davidson TS, DiPaolo RJ, Andersson J, Shevach EM (2007) Cutting edge: IL-2 is essential for TGF-beta-mediated induction of Foxp3+ T regulatory cells. *J Immunol* 178(7):4022–4026.

4. Kamimura S, Tsukamoto H (1995) Cytokine gene expression by Kupffer cells in experimental alcoholic liver disease. *Hepatology* 22(4 Pt 1):1304–1309.
5. Porta C, et al. (2009) Tolerance and M2 (alternative) macrophage polarization are related processes orchestrated by p50 nuclear factor kappaB. *Proc Natl Acad Sci USA* 106(35):14978–14983.

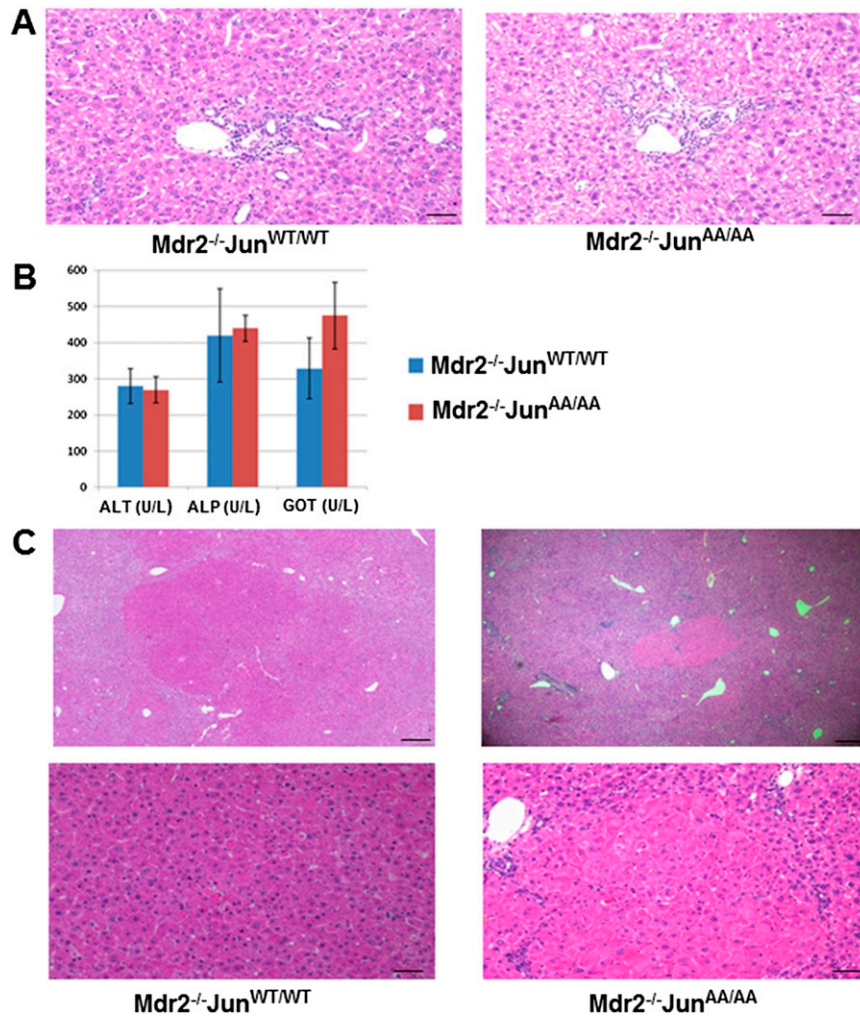

**Fig. S1.** JNP modulates hepatocarcinogenesis in  $Mdr2^{-/-}$  mice. (A) Representative H&E-stained sections of liver parenchymas from 7-mo-old mice of the indicated genotypes, showing similar inflammatory infiltrates. (Scale bars: 50  $\mu$ m.) (B) Liver damage markers in sera of 7-mo-old  $Mdr2^{-/-}c-Jun^{WT/WT}$  and  $Mdr2^{-/-}c-Jun^{AA/AA}$  mice. Alanine transaminase (ALT),  $n = 12$ ; alkaline phosphatase (ALP) and aspartate aminotransferase/glutamic oxaloacetic transaminase (AST/GOT),  $n = 6$ . Bars correspond to mean  $\pm$  SEM. (C) Representative H&E-stained sections of liver tumors from 11-mo-old mice of the indicated genotypes, showing reduced tumor diameter in  $Mdr2^{-/-}c-Jun^{AA/AA}$  mice (Upper). Lower shows higher magnification of the tumors. (Scale bars: Upper, 200  $\mu$ m; Lower, 50  $\mu$ m.)

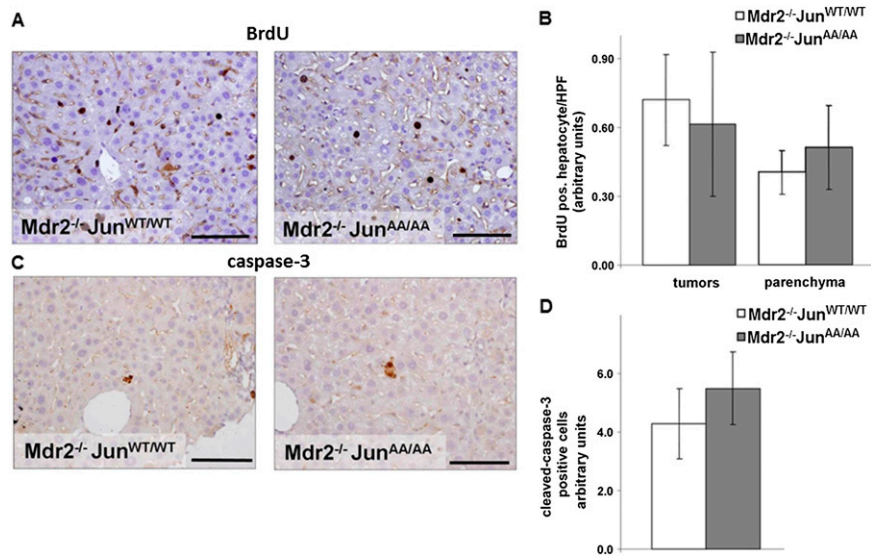

**Fig. S2.** JNP does not alter proliferation or apoptosis in  $Mdr2^{-/-}$  mice. (A) Representative photomicrographs of immunostains for the proliferation marker BrdU in liver parenchymas of 11-mo-old  $Mdr2^{-/-}c-Jun^{WT/WT}$  and  $Mdr2^{-/-}c-Jun^{AA/AA}$  mice. (Scale bars: 125  $\mu m$ .) (B) Quantification of BrdU-positive hepatocytes in liver parenchyma and tumor tissue ( $n = 10$ ; bars correspond to mean  $\pm$  SEM). pos, positive; HPF, high power field. (C) Representative photomicrographs of immunostaining for apoptotic cells using anti-cleaved caspase-3 antibody in liver parenchyma of 11-mo-old  $Mdr2^{-/-}c-Jun^{WT/WT}$  and  $Mdr2^{-/-}c-Jun^{AA/AA}$  livers. (Scale bars: 125  $\mu m$ .) (D) Quantification of cleaved caspase-3-positive cells in liver parenchyma ( $n = 7$ ; bars correspond to mean  $\pm$  SEM).

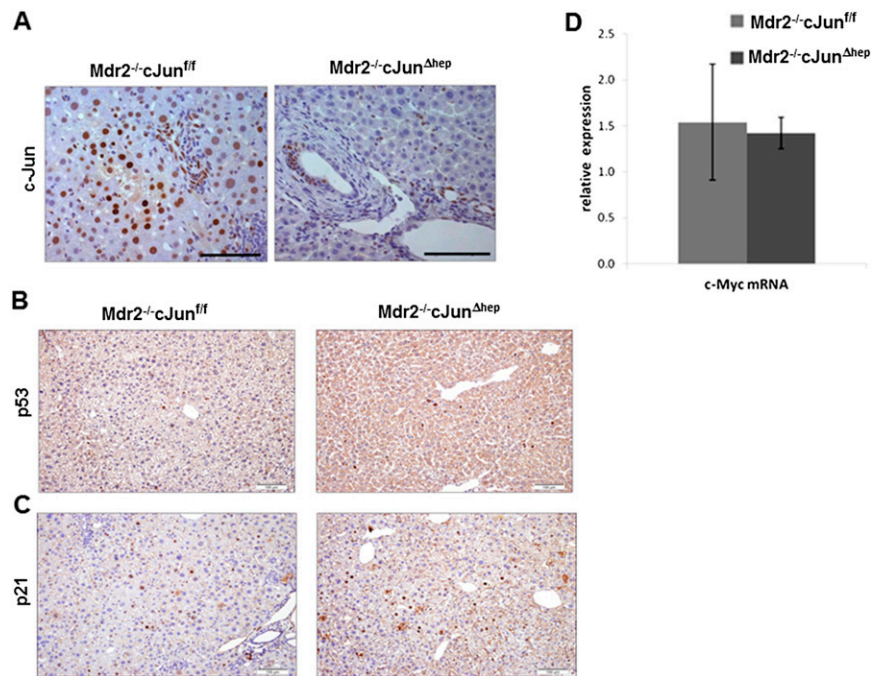

**Fig. S3.** The p53 axis is not activated in  $Mdr2^{-/-}$  liver parenchymas. (A) c-Jun immunostains in liver parenchyma of mice with the indicated genotype. (Scale bars: 100  $\mu m$ .) (B and C) p53 (B) and p21 (C) immunostains in liver parenchymas of 15-mo-old  $Mdr2^{-/-}c-Jun^{fl/fl}$  and  $Mdr2^{-/-}c-Jun^{\Delta hep}$  mice. (Scale bars: 100  $\mu m$ .) (D) qPCR analysis of c-Myc mRNA levels in liver lysates of 15-mo-old  $Mdr2^{-/-}c-Jun^{fl/fl}$  or  $Mdr2^{-/-}c-Jun^{\Delta hep}$  mice ( $n = 6$ ; bars correspond to mean  $\pm$  SEM).

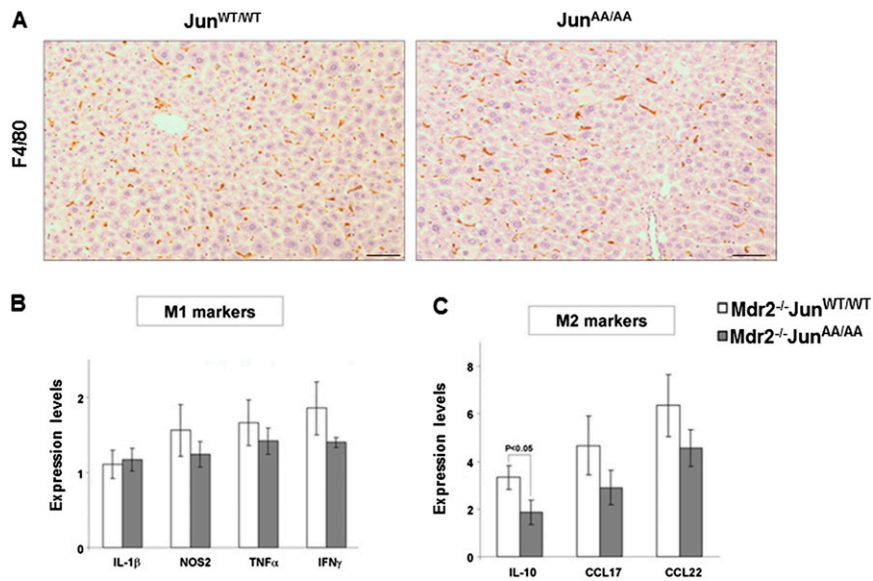

**Fig. 54.** Kupfer cell numbers are not affected by JNP in the noninflamed liver. (A) Representative immunostains for the macrophage marker F4/80 in liver parenchymas of *c-Jun<sup>WT/WT</sup>* and *c-Jun<sup>AA/AA</sup>* mice, both harboring the WT *Mdr2* allele. (Scale bars: 100  $\mu$ m.) (B and C) qPCR analysis for M1 (B) and M2 (C) markers in total liver lysates from 11-mo-old *Mdr2<sup>-/-</sup>-c-Jun<sup>WT/WT</sup>* or *Mdr2<sup>-/-</sup>-c-Jun<sup>AA/AA</sup>* mice ( $n = 9$ ; mean  $\pm$  SEM).

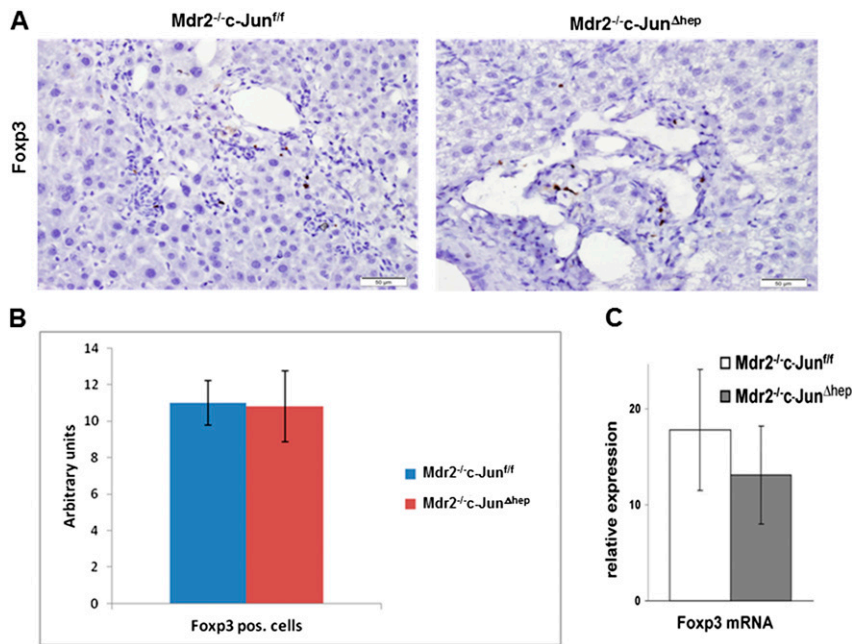

**Fig. 55.** Deleting hepatocyte *c-Jun* does not affect Treg cell numbers in *Mdr2<sup>-/-</sup>* mice. (A) Representative immunostains for Foxp3 in liver parenchymas of 15-mo-old *Mdr2<sup>-/-</sup>-c-Jun<sup>fl/fl</sup>* and *Mdr2<sup>-/-</sup>-c-Jun<sup>Δhep</sup>* mice. (Scale bars: 50  $\mu$ m.) (B) Quantification of Foxp3 immunostaining ( $n \geq 11$ ; bars correspond to mean  $\pm$  SEM). pos, positive. (C) qPCR analysis of Foxp3 expression in liver lysates of 15-mo-old mice ( $n = 5$ ; mean  $\pm$  SEM).

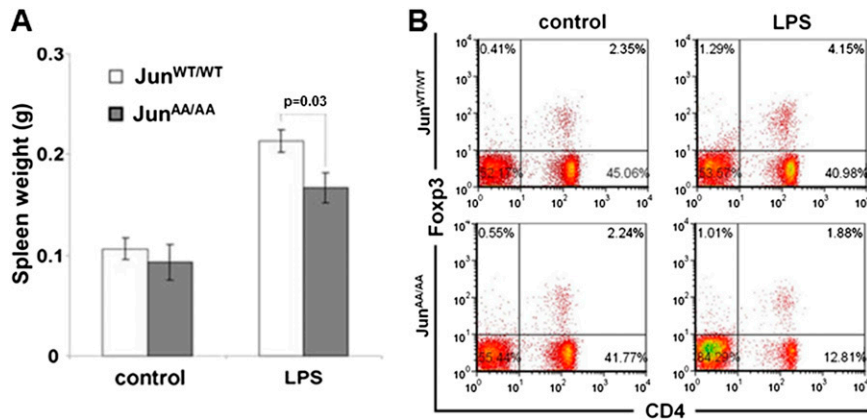

**Fig. 56.** Treg accumulation depends on JNP. Liposomal LPS induced chronic inflammation. (A) Spleen weights ( $n = 3$ ; mean  $\pm$  SEM). (B) FACS dot plots of Fopx3-positive vs. CD4-positive cells in PBLs.

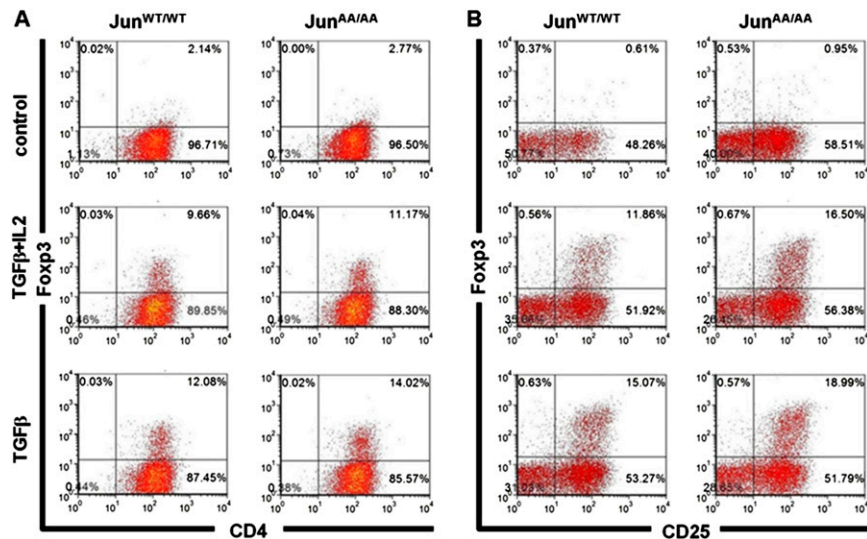

**Fig. 57.** JNP is not necessary for generation of inducible Treg cells. Naive CD4<sup>+</sup>CD25<sup>-</sup> T cells were isolated from spleens of c-Jun<sup>WT/WT</sup> and c-Jun<sup>AA/AA</sup> mice and stimulated ex vivo with anti-CD3 and -CD28 monoclonal Abs. To induce Treg cells (CD4<sup>+</sup>CD25<sup>+</sup>Fopx3<sup>+</sup>) generation from primary T cells (CD4<sup>+</sup>CD25<sup>-</sup>Fopx3<sup>-</sup>), cells were treated with TGF- $\beta$  alone or TGF- $\beta$  plus IL-2 or left untreated (control). Percentage of Treg cells was determined by FACS analysis. (A) Representative FACS analysis of Fopx3 vs. CD4. (B) Representative FACS analysis of Fopx3 vs. CD25.

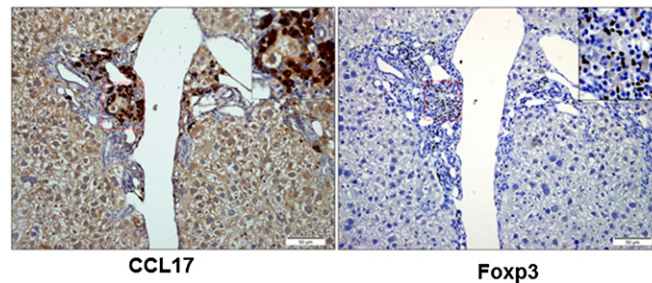

**Fig. 58.** Treg cells intermingle between macrophages in *Mdr2*<sup>-/-</sup> mouse livers. Representative immunohistochemical stains for CCL17 and Fopx3 on serial liver sections of 11-mo-old *Mdr2*<sup>-/-</sup> mice are shown. *Inset* shows higher magnification of the boxed region. (Scale bars: 50  $\mu$ m.)

**Table S1. Primers used for qPCR analysis**

| Target gene | Forward primer                | Reverse primer           |
|-------------|-------------------------------|--------------------------|
| Foxp3       | agccatggcaatagttccttccca      | tccgataagggtggcataggtgaa |
| TGFβ1       | accaactattgcttcagcttcagctccac | gatccacttccaacccagggtc   |
| IL-10       | ggttgccaagccttatcggga         | acctgctccactgccttgct     |
| CCL17       | agtgtctgctggattacttcaaag      | ctggacagtcagaaacacgatgg  |
| CCL2        | aagccagctctctcttctcca         | gcgtaactgcactctggctga    |
| CCL22       | taacatcatggctaccctgcg         | tgtottccacattggcacca     |
| iNOS        | gccaccaacaatggcaaca           | cgtaccggatgagctgtgaatt   |
| IFN-γ       | tccgagcagagatcttcaggaa        | tgcaaccaccactcattctgag   |
| IL-12p40    | ggaagcacggcagcagaata          | aacttgaggagaagttagaatgg  |
| CXCL10      | ccgtcattttctgctcatcc          | ccctatggccctcatttca      |
| TNF         | gaaaagcaagcagccaacca          | cggatcatgctttctgtgctc    |
| Actin       | cccaaggccaaccgcgagaagat       | gtcccgccagccagggtccag    |
| PP1A        | tgtaaagtaccaccctggcacat       | cgcgtctcctcogagctgtttg   |
| HPRT        | ggtaagcagtacagccccaaa         | agggcataccaacaacaactt    |
| Myc         | tgagcccctagtgtgcat            | agcccgactccgacctctt      |

**Table S2. Primers used for genotyping**

| Genotype                              | Forward primer                 | Reverse primer           |
|---------------------------------------|--------------------------------|--------------------------|
| Mdr2 <sup>-/-</sup>                   | gctgagatggatcttgag             | gtcagtagccagatgatgg      |
| Neo                                   | tgtcaagaccgacctgtccg           | tattcggcaagcaggcatcg     |
| Jun <sup>AA</sup> & Jun <sup>FF</sup> | ctcataccagttcgcacaggcacaggcggc | ccgctagcactcacgttggtaggc |
| AFP-Cre                               | cggtcgatgcaacgagtgatgagg       | ccagagacggaaatccatcgctcg |
